# Supplementary material for: Defining Research Priorities for Nutrition and Mental Health: Insights from Dietetics Practice
Source: Atypon-hosted journal article supplement (doi:10.3148/cjdpr-2015-033), 2015-11-16
Supplement: cjdpr-2015-033suppl.pdf [file cjdpr-2015-033suppl.pdf]

**Supplementary Figure 1: Mental health condition and specialized population research priorities of registered dietitians by years of practice**

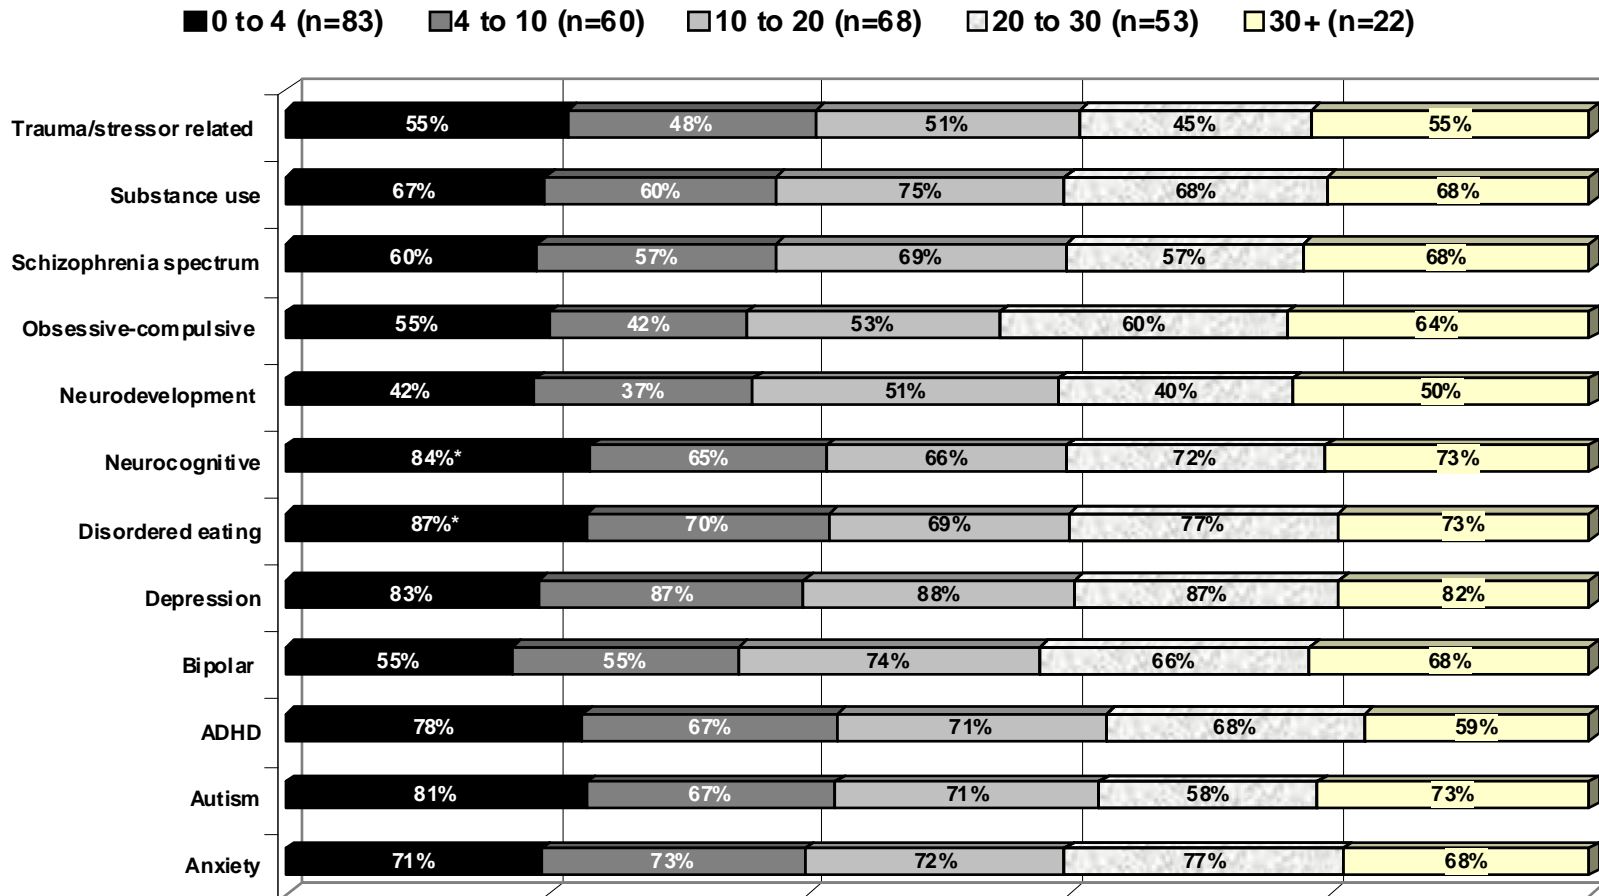

**Supplementary Figure 1: Mental health condition and specialized population research priorities of registered dietitians by years of practice /cont'd..**

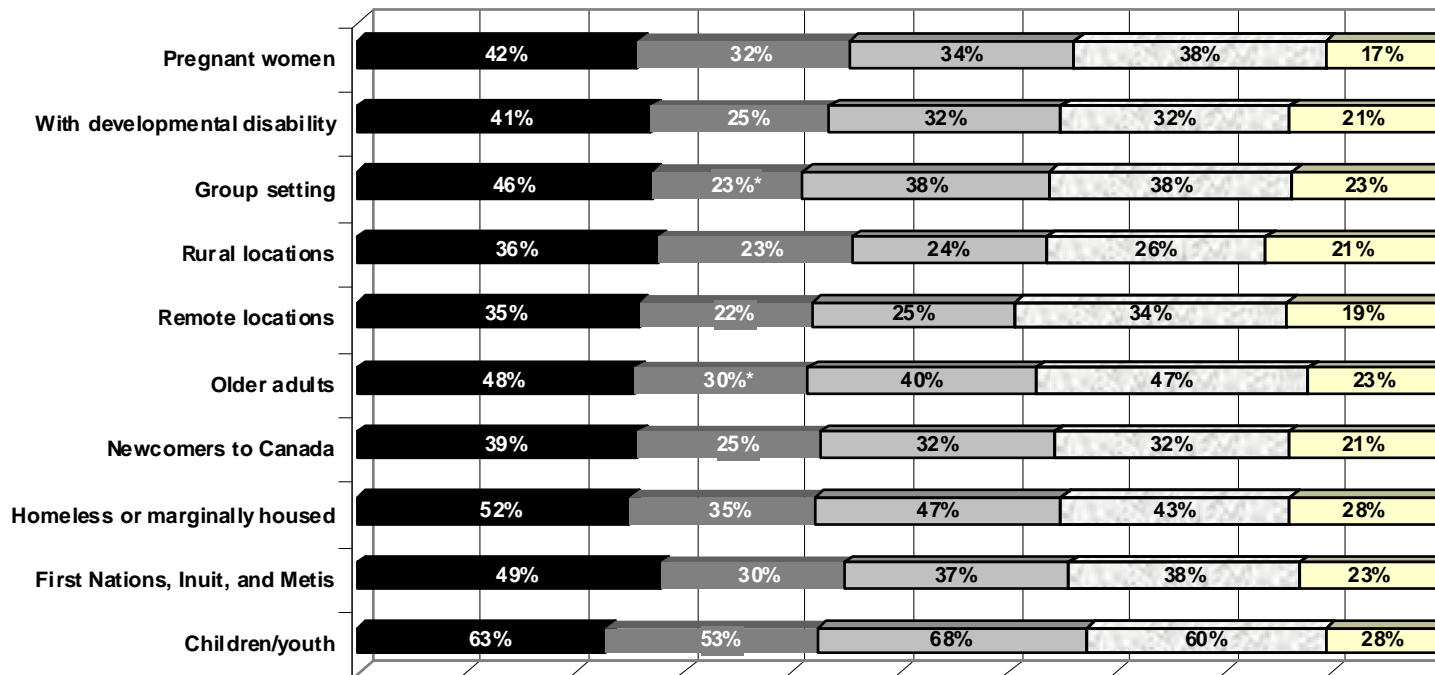

Notes: Disordered Eating - Examples: anorexia nervosa, bulimia nervosa; Neurocognitive disorders - Examples: Alzheimers disease, dementia; Neurodevelopment disorders - Examples: Tourette's syndrome; Trauma or stressor-related disorders - Examples: Post-traumatic stress disorder; Group setting: individuals that live in a home or facility; Pregnant women includes prenatal and post-partum period

\*Significantly higher proportion when compared to all sampled dietitians at  $p < 0.05$

**Supplementary Figure 2: Mental health condition and specialized population research priorities of registered dietitians by community type**

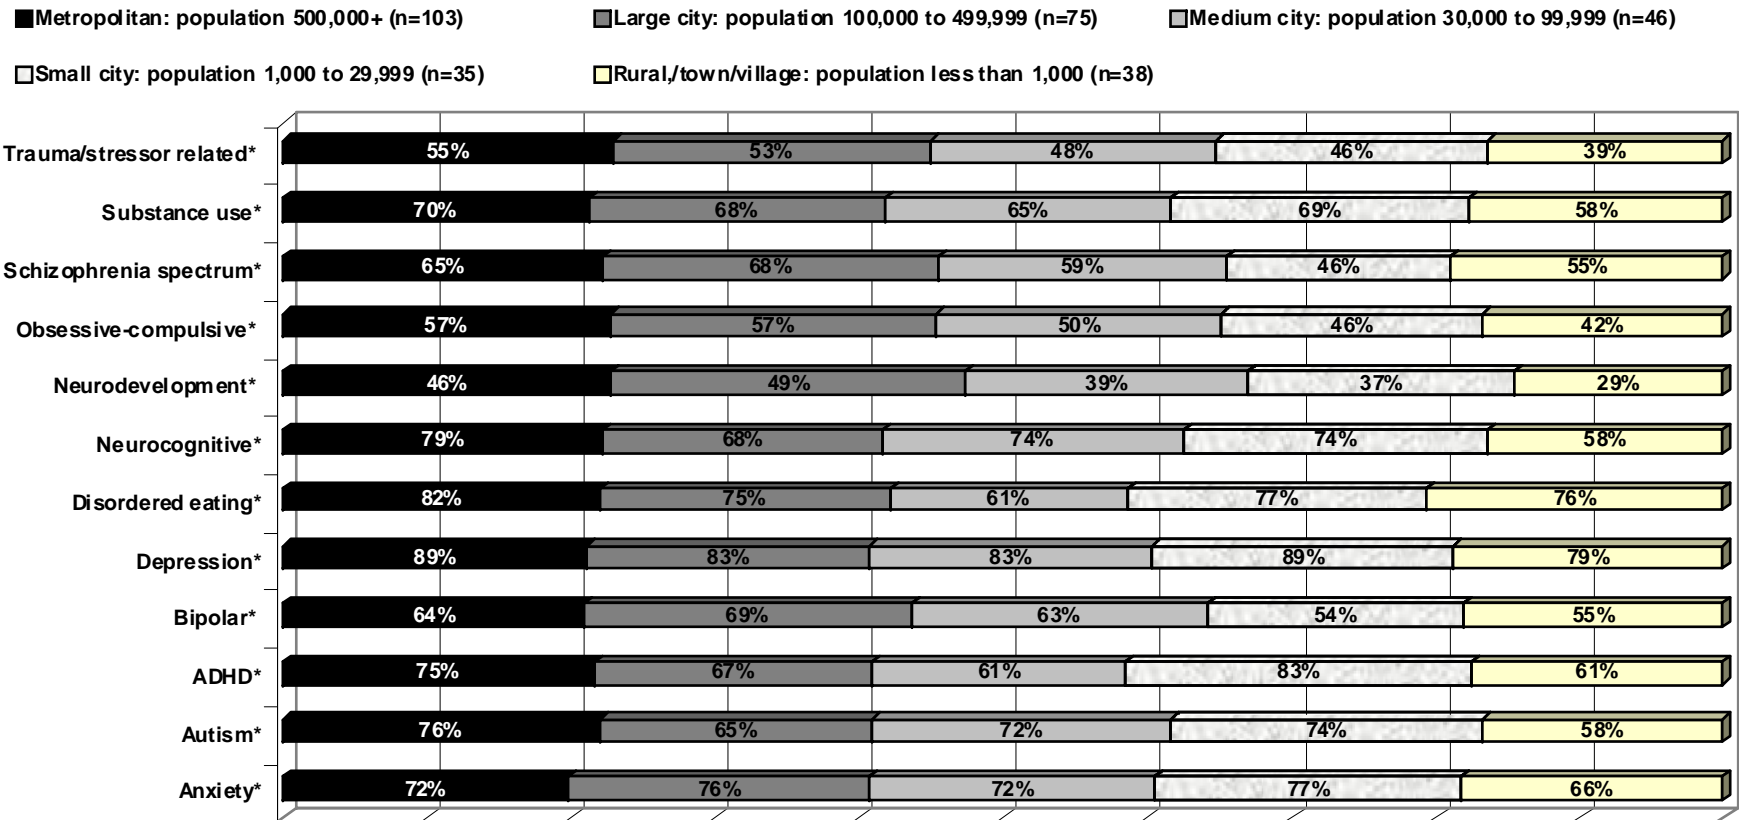

**Supplementary Figure 2: Mental health condition and specialized population research priorities of registered dietitians by community type /cont'd..**

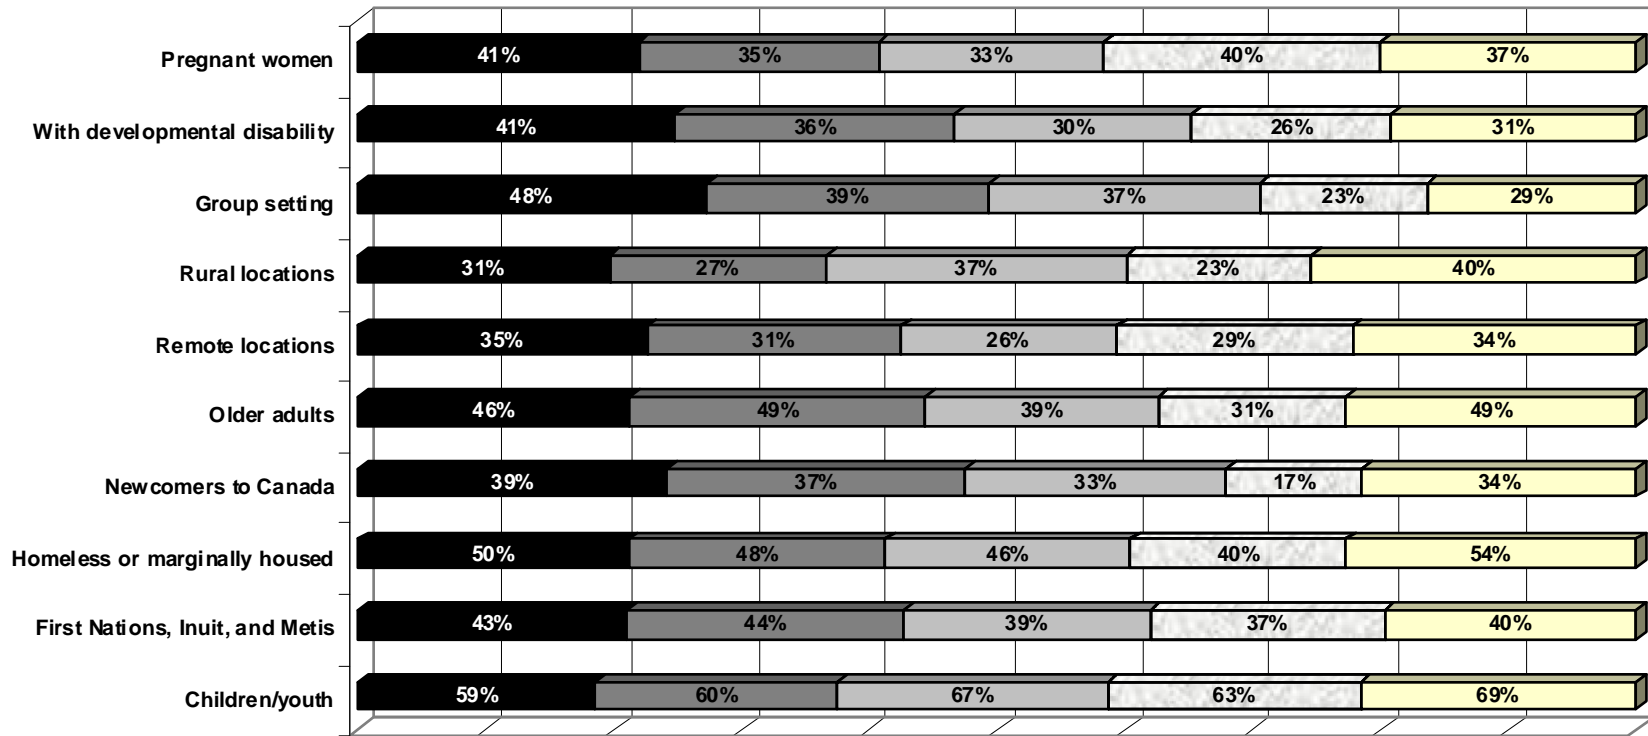

\* Indicates significant association among the community sizes at  $p < 0.05$

Notes: Disordered Eating - Examples: anorexia nervosa, bulimia nervosa; Neurocognitive disorders - Examples: Alzheimers disease, dementia; Neurodevelopment disorders - Examples: Tourette's syndrome; Trauma or stressor-related disorders - Examples: Post-traumatic stress disorder; Group setting: individuals that live in a home or facility; Pregnant women includes prenatal and post-partum period

**Supplementary Figure 3: Mental health condition and specialized population research priorities of registered dietitians by stakeholder types**

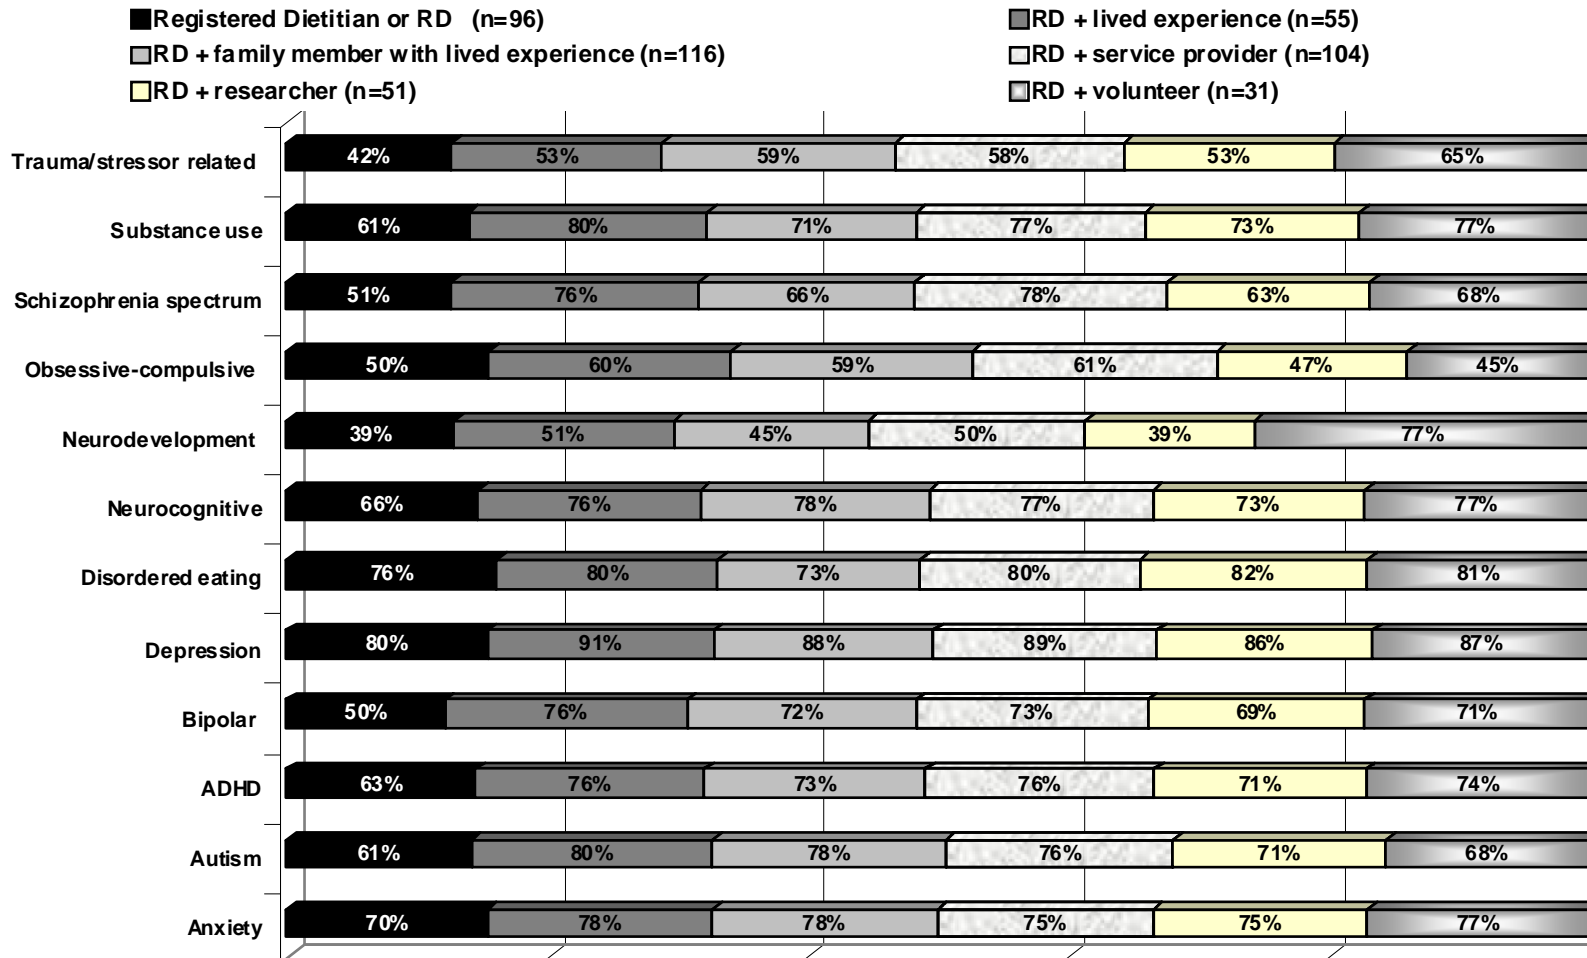

**Supplementary Figure 3: Mental health condition and specialized population research priorities of registered dietitians by stakeholder types /cont'd..**

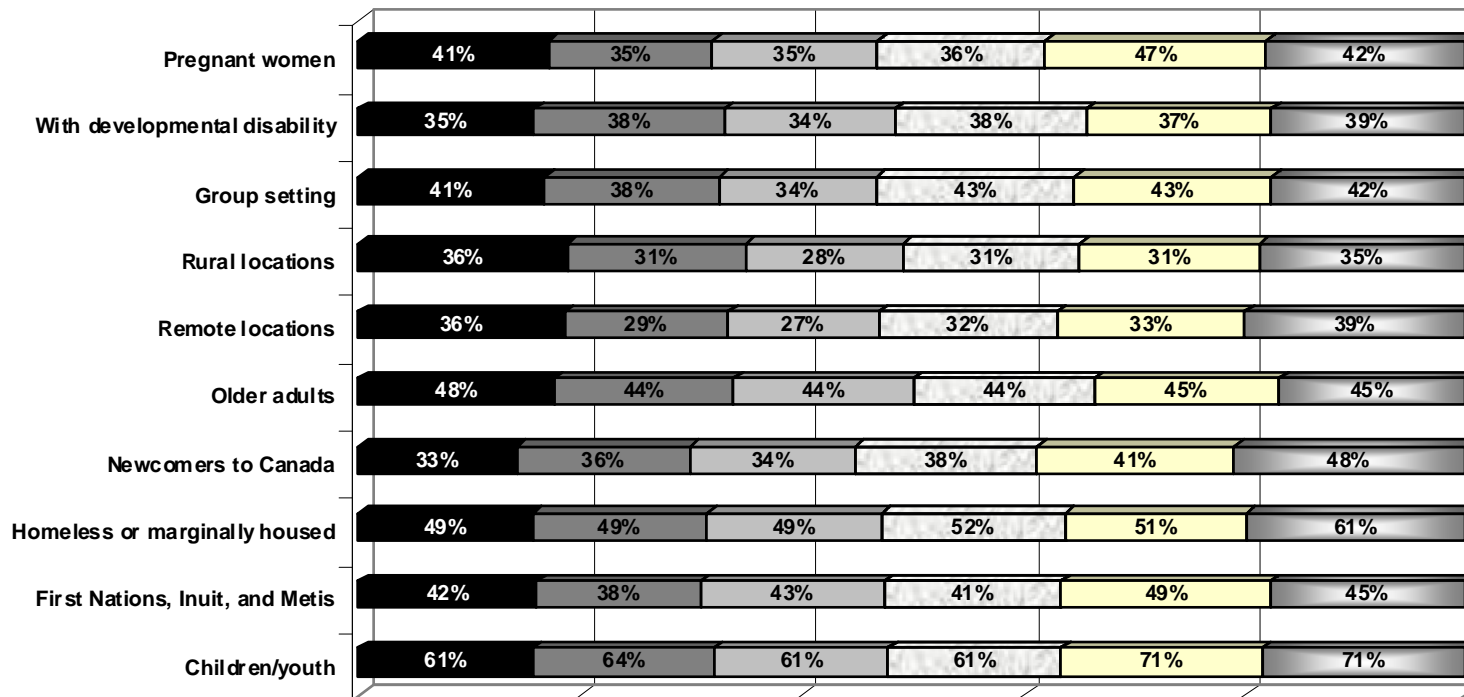

Notes: Disordered Eating - Examples: anorexia nervosa, bulimia nervosa; Neurocognitive disorders - Examples: Alzheimers disease, dementia; Neurodevelopment disorders - Examples: Tourette's syndrome; Trauma or stressor-related disorders - Examples: Post-traumatic stress disorder; Group setting: individuals that live in a home or facility; Pregnant women includes prenatal and post-partum period
